# Supplementary material
Source: PubMed Central journal article supplement (PMC6460401)
Supplement: ct8b01255_si_001.pdf [file ct8b01255_si_001.pdf]

# Supporting Information:

## An automated multi-scale approach to predict self-diffusion from a potential energy field

Amber Mace,<sup>†,‡,¶</sup> Senja Barthel,<sup>†,‡</sup> and Berend Smit<sup>\*,‡</sup>

*†Joint first authors*

*‡Institut des Sciences et Ingénierie Chimiques, Valais, Ecole Polytechnique Fédérale de Lausanne (EPFL), Rue de l'Industrie 17, CH-1951 Sion, Switzerland*

*¶Department of Materials and Environmental Chemistry, Stockholm University, SE-106 91 Stockholm, Sweden*

E-mail: berend.smit@epfl.ch

To estimate the statistical error of the computed diffusion coefficients we ran 10 separate simulations with molecular dynamics (MD) and kinetic Monte Carlo (kMC), respectively. Diffusion coefficients were computed for each simulation and the averaged values,  $\tilde{D}$ , in each direction together with corresponding standard deviations,  $\sigma D$ , are presented in table S1. For the IFY structure the diffusive regime is not reached within the time scale of the MD simulation while in the kMC it does where the kMC shows diffusion coefficients at the limit of what can be probed within the MD timescale. Data points of the 4 remaining directional diffusion coefficients (1 from the 1-dimensional diffusion channel PSI structure and 3 from the 3-dimensional AEI) are presented with statistical errors in figure S1. Figures S2–S11 present the mean square displacements (MSD) for all simulations. Figures S2, S3, S6, S8 and S9 present the log-log plots of the MSDs showing that the diffusive regime has been reached when the slope is equal to 1 while

Figures S4, S5, S7, S10 and S11 present the linear plots of the MSDs presented together with the mean square regressed first degree polynomial used to compute the diffusion coefficients presented in table S1 and figure S1. These polynomials are fitted to the data points between the first MSD point passing  $l^2$  and the first point passing  $2l^2$  where  $l$  is the length of the unit cell in respective direction.

Table S1: Averaged directional diffusion coefficients and standard deviations for structures PSI, IFY and AEI. Data is presented in  $cm^2/s$ .

|         | $\bar{D}_x$ | $\sigma D_x$ | $\bar{D}_y$ | $\sigma D_y$ | $\bar{D}_z$ | $\sigma D_z$ |
|---------|-------------|--------------|-------------|--------------|-------------|--------------|
| AEI kMC | 2.8e-6      | 0.7e-6       | 5.0e-7      | 2.6e-7       | 7.9e-7      | 3.9e-7       |
| AEI MD  | 3.5e-6      | 0.8e-6       | 3.0e-6      | 0.6e-6       | 2.7e-6      | 1.4e-6       |
| IFY kMC | 7.5e-7      | 1.9e-7       | 7.2e-7      | 1.3e-7       | 0           | 0            |
| IFY MD  | 0           | 0            | 0           | 0            | 0           | 0            |
| PSI kMC | 1.85e-4     | 0.01e-4      | 0           | 0            | 0           | 0            |
| PSI MD  | 2.4e-5      | 0.3e-5       | 0           | 0            | 0           | 0            |

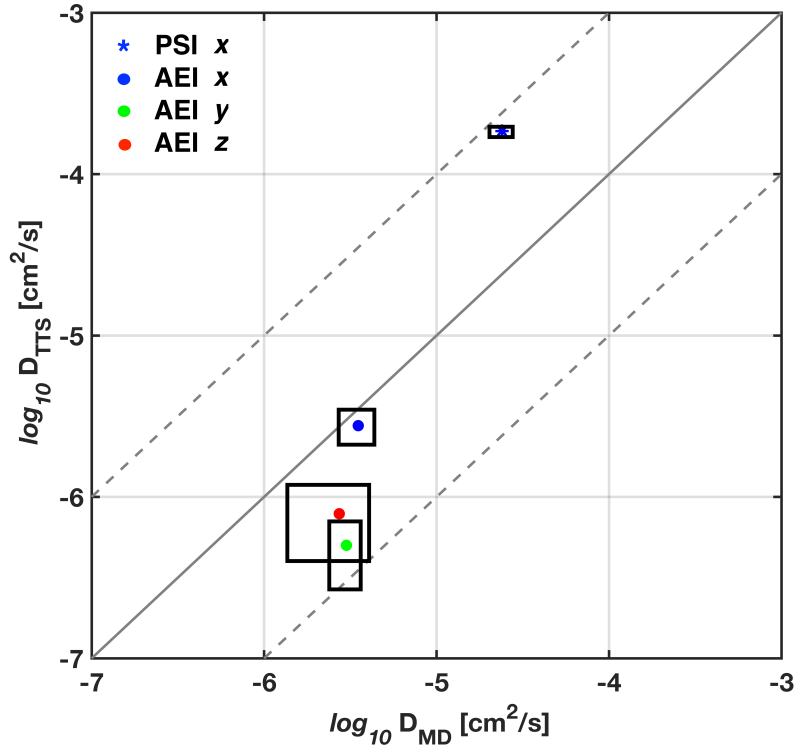

Figure S1: Markers present averaged directional diffusion coefficients computed from MD as compared to those computed with kMC. The standard deviations are represented by black boxes surrounding the respective markers. The solid grey line represents a perfect correspondence between the MD and kMC data while the grey dashed lines guide the limits for the deviation of 1 order of magnitude.

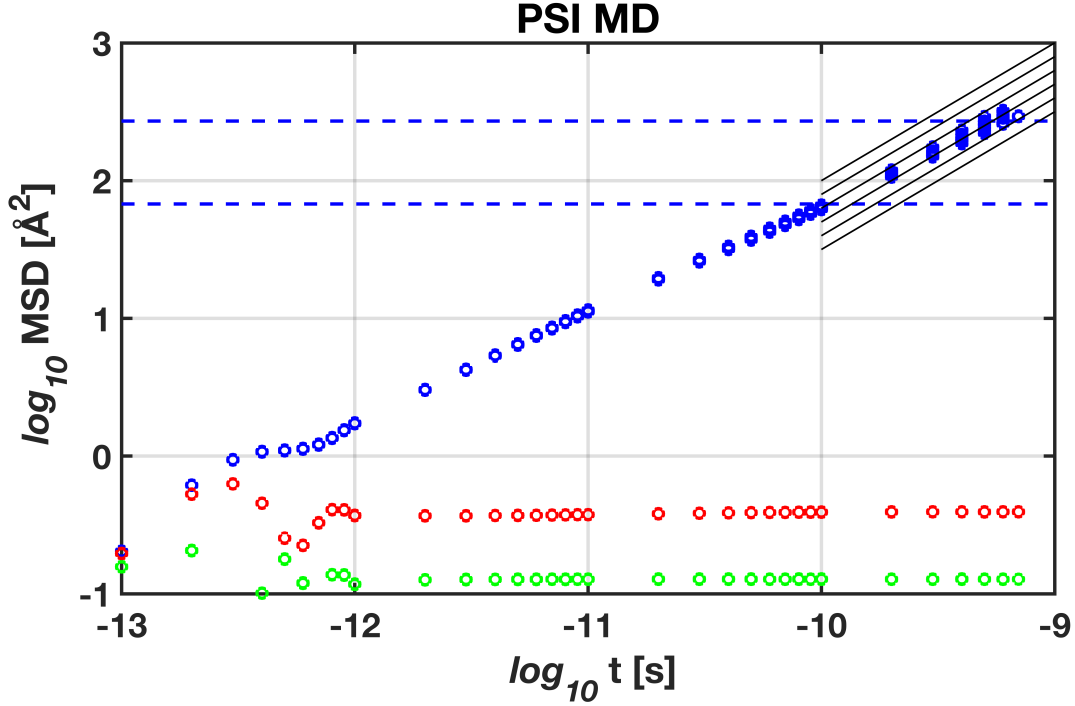

Figure S2: Log-log plots of the MD MSD (is  $x$ =blue,  $y$ =green,  $z$ =red) as a function of time. The black solid lines represent slopes equaling 1 confirming the diffusive regime of the MSD. The horizontal dashed lines represent  $l^2$  and  $2l^2$  for diffusive directions in respective color.

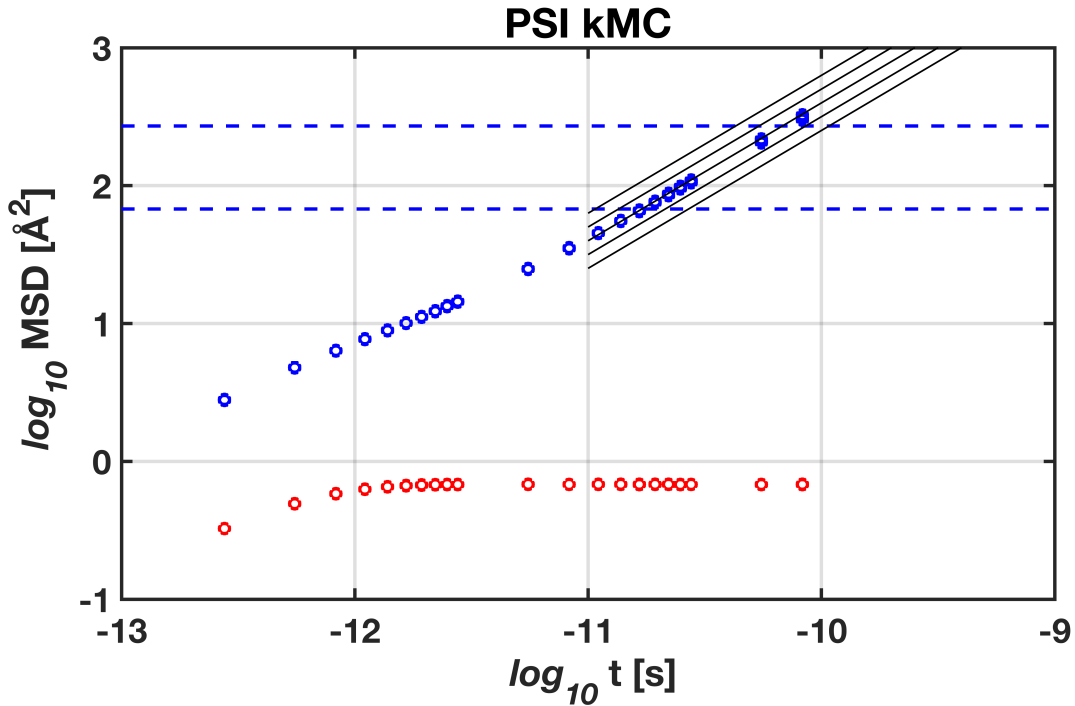

Figure S3: Log-log plots of the kMC MSD (is  $x$  = blue,  $z$  = red) as a function of time. The black solid lines represent slopes equaling 1 confirming the diffusive regime of the MSD. The horizontal dashed lines represent  $l^2$  and  $2l^2$  for diffusive directions in respective color. The MSD curve for the  $y$ -direction is in the range of  $10^{-3}$  and outside the plotted region.

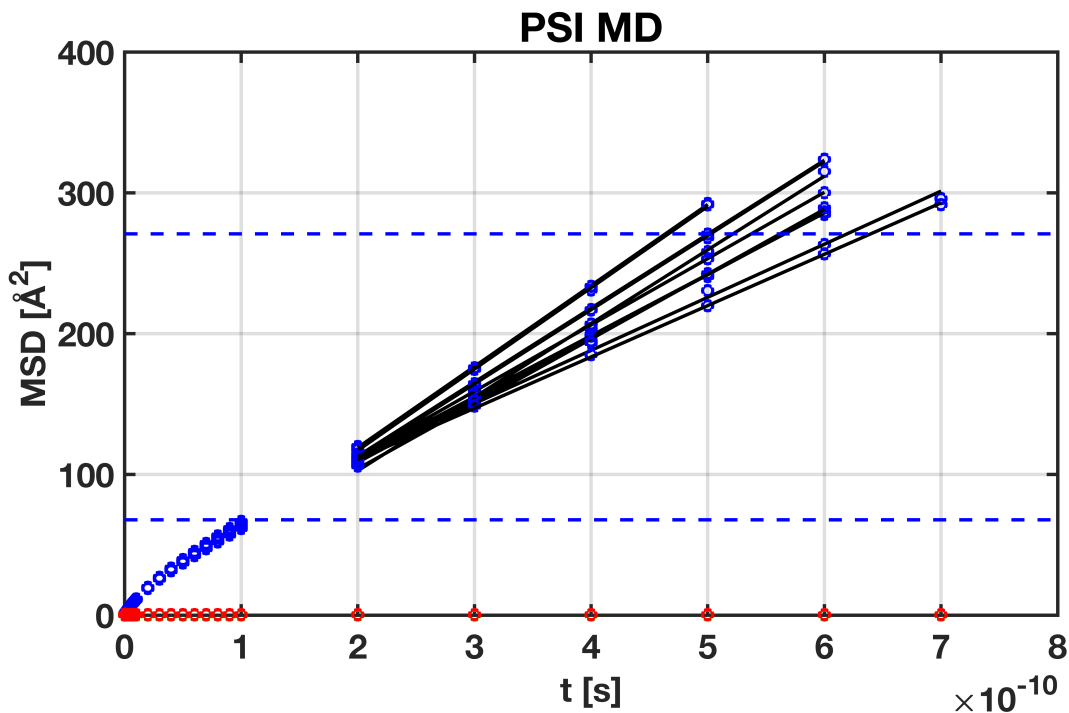

Figure S4: Linear plots of the MD MSD (is  $x = \text{blue}$ ,  $y, z = \text{red}$ ) as a function of time. The black lines represent the 1st degree polynomials fitted to each MSD curve. The horizontal dashed lines represent  $l^2$  and  $2l^2$  for diffusive directions in respective color.

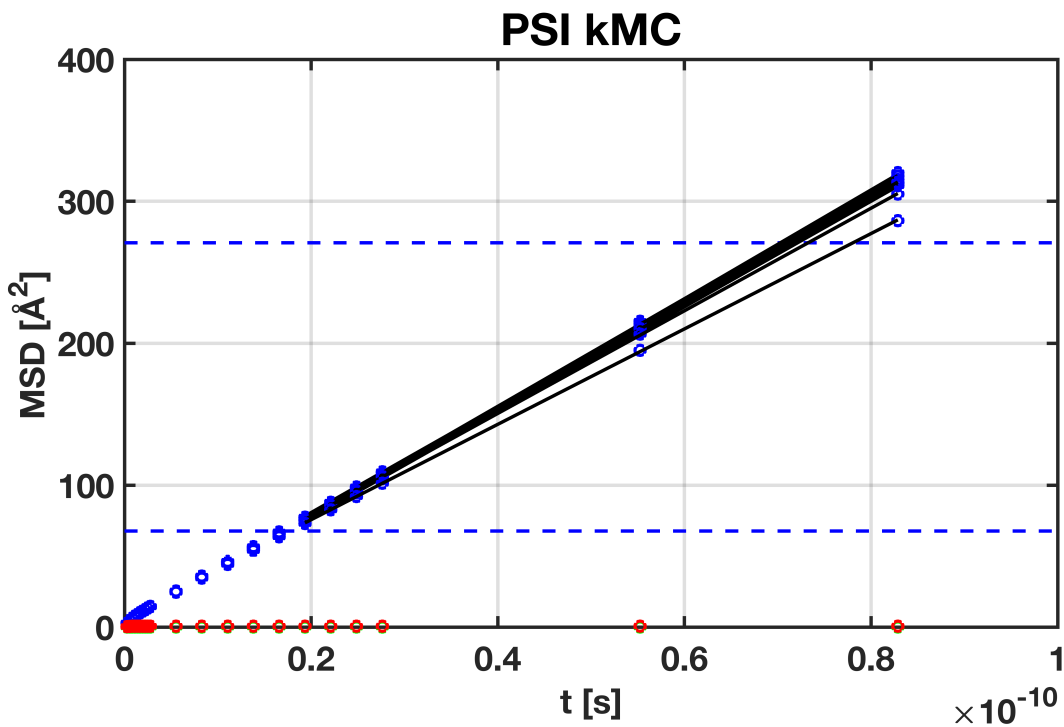

Figure S5: Linear plots of the kMC MSD (is  $x = \text{blue}$ ,  $y, z = \text{red}$ ) as a function of time. The black lines represent the 1st degree polynomials fitted to each MSD curve. The horizontal dashed lines represent  $l^2$  and  $2l^2$  for diffusive directions in respective color.

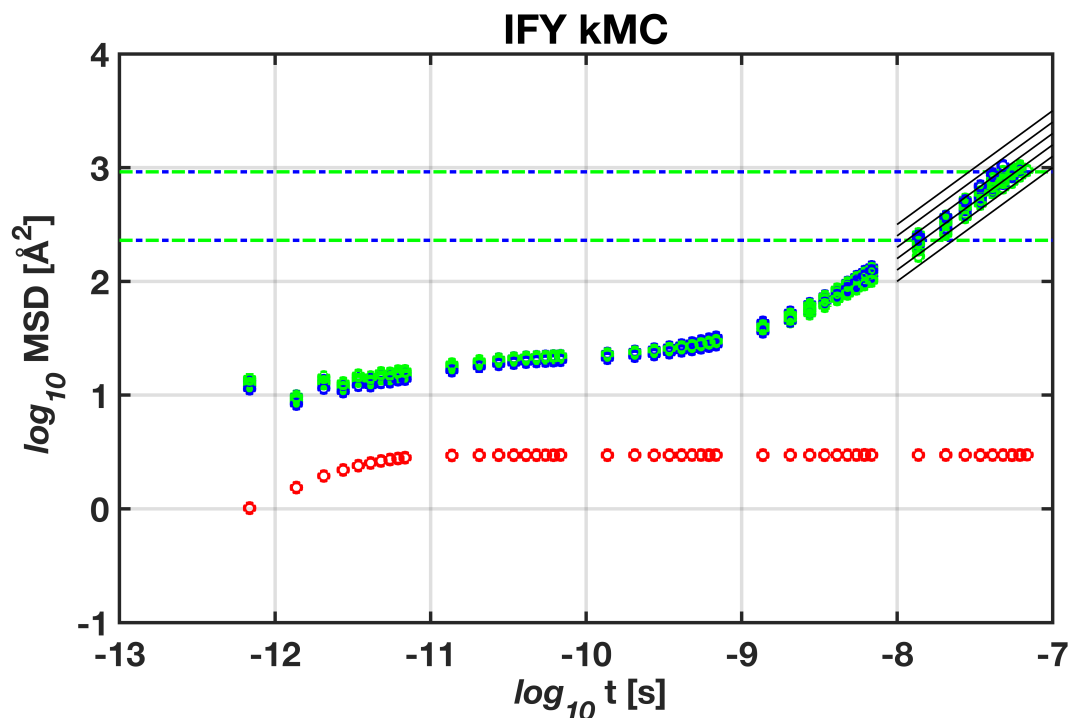

Figure S6: Log-log plots of the kMC MSD (is  $x = \text{blue}$ ,  $y = \text{green}$ ,  $z = \text{red}$ ) as a function of time. The black solid lines represent slopes equaling 1 confirming the diffusive regime of the MSD. The horizontal dashed lines represent  $l^2$  and  $2l^2$  for diffusive directions in respective color.

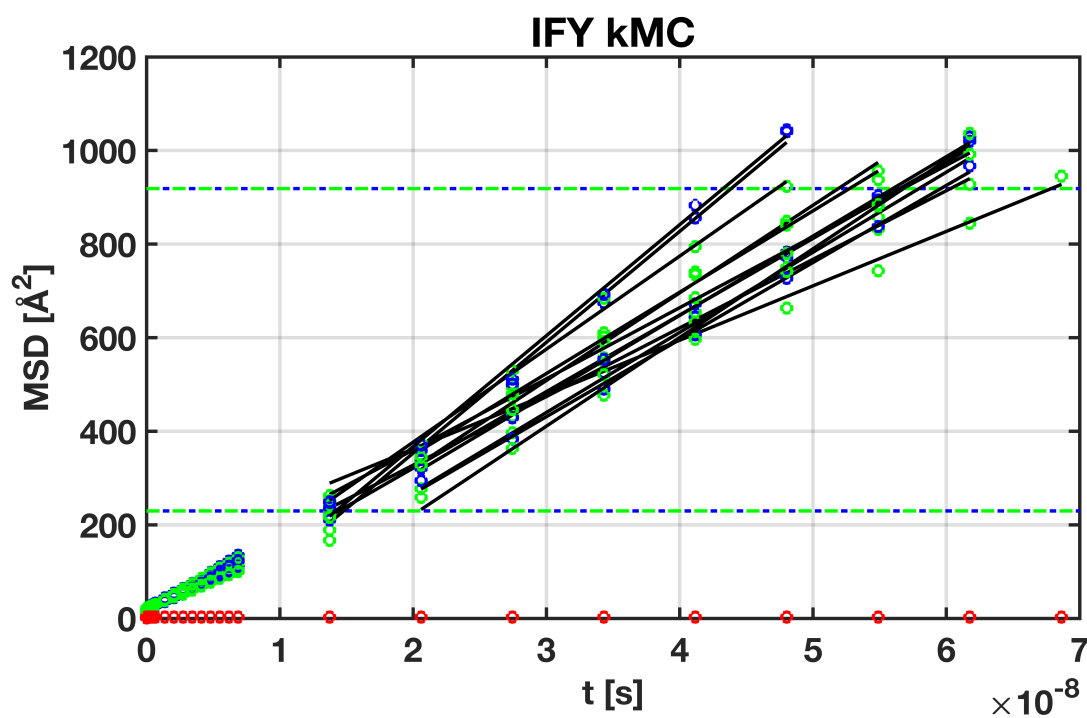

Figure S7: Linear plots of the kMC MSD (is  $x = \text{blue}$ ,  $y = \text{green}$ ,  $z = \text{red}$ ) as a function of time. The black lines represent the 1st degree polynomials fitted to each MSD curve. The horizontal dashed lines represent  $l^2$  and  $2l^2$  for diffusive directions in respective color.

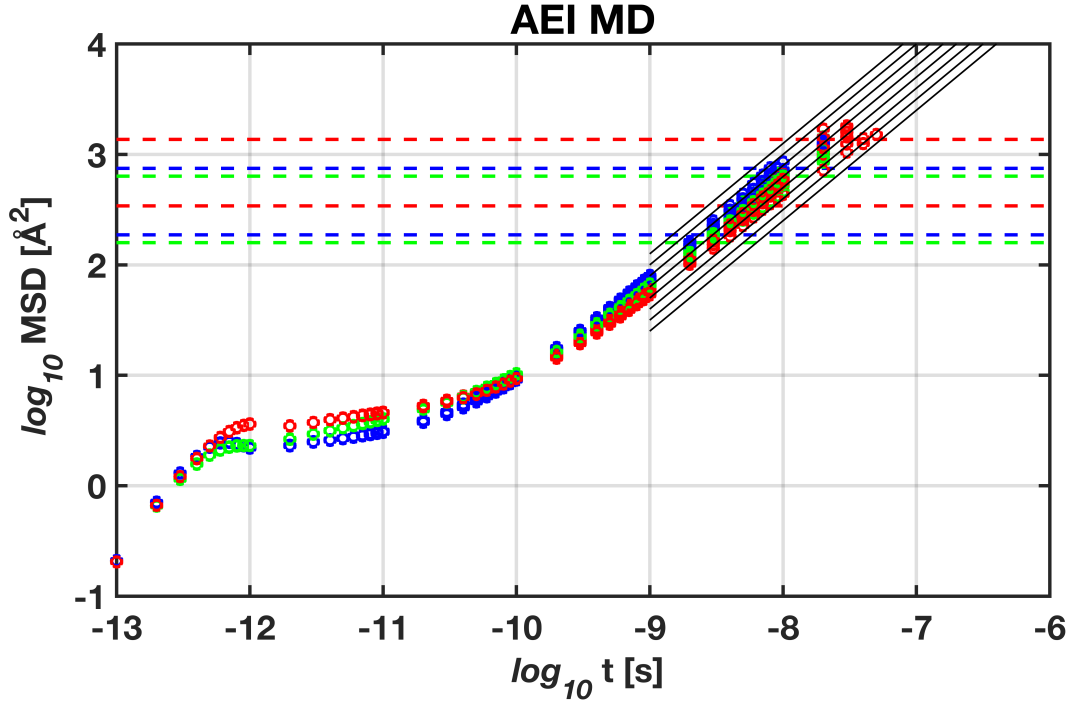

Figure S8: Log-log plots of the MD MSD (is  $x =$  blue,  $y =$  green,  $z =$  red) as a function of time. The black solid lines represent slopes equaling 1 confirming the diffusive regime of the MSD. The horizontal dashed lines represent  $l^2$  and  $2l^2$  for diffusive directions in respective color.

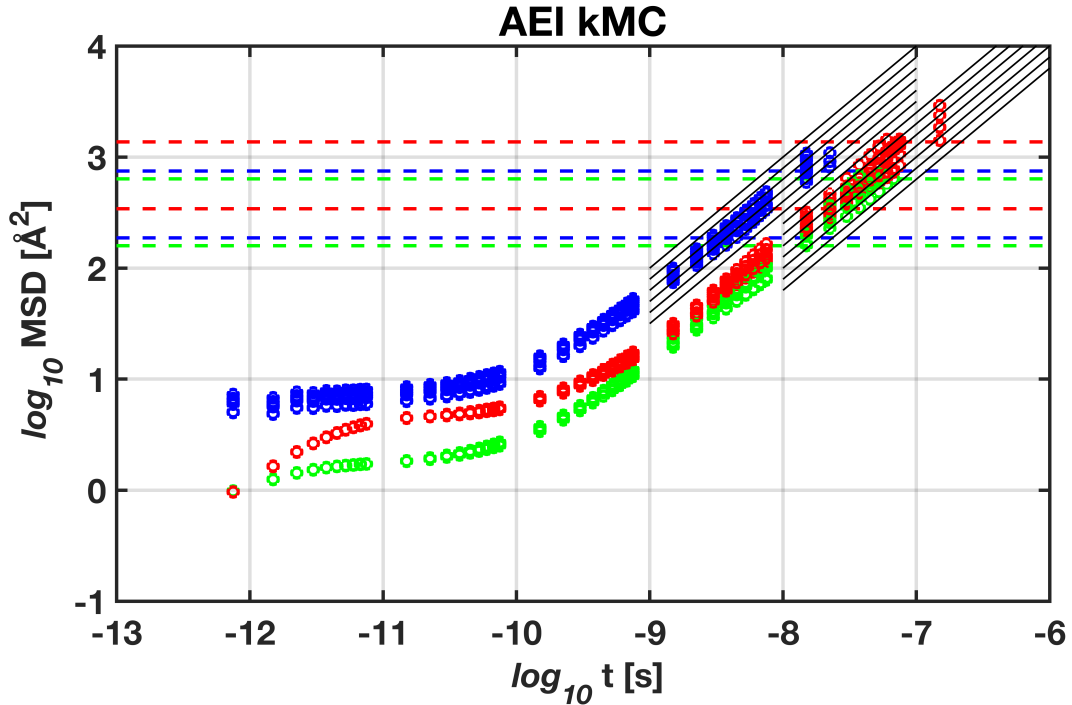

Figure S9: Log-log plots of the kMC MSD (is  $x =$  blue,  $y =$  green,  $z =$  red) as a function of time. The black solid lines represent slopes equaling 1 confirming the diffusive regime of the MSD. The horizontal dashed lines represent  $l^2$  and  $2l^2$  for diffusive directions in respective color.

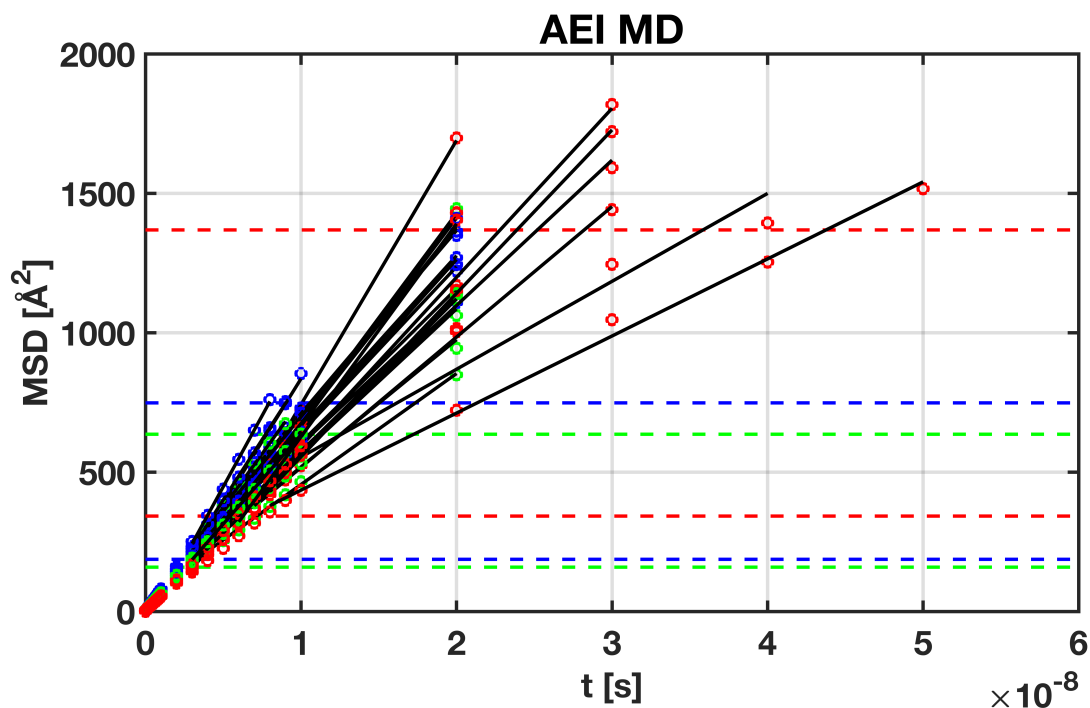

Figure S10: Linear plots of the MD MSD (is  $x = \text{blue}$ ,  $y = \text{green}$ ,  $z = \text{red}$ ) as a function of time. The black lines represent the 1st degree polynomials fitted to each MSD curve. The horizontal dashed lines represent  $l^2$  and  $2l^2$  for diffusive directions in respective color.

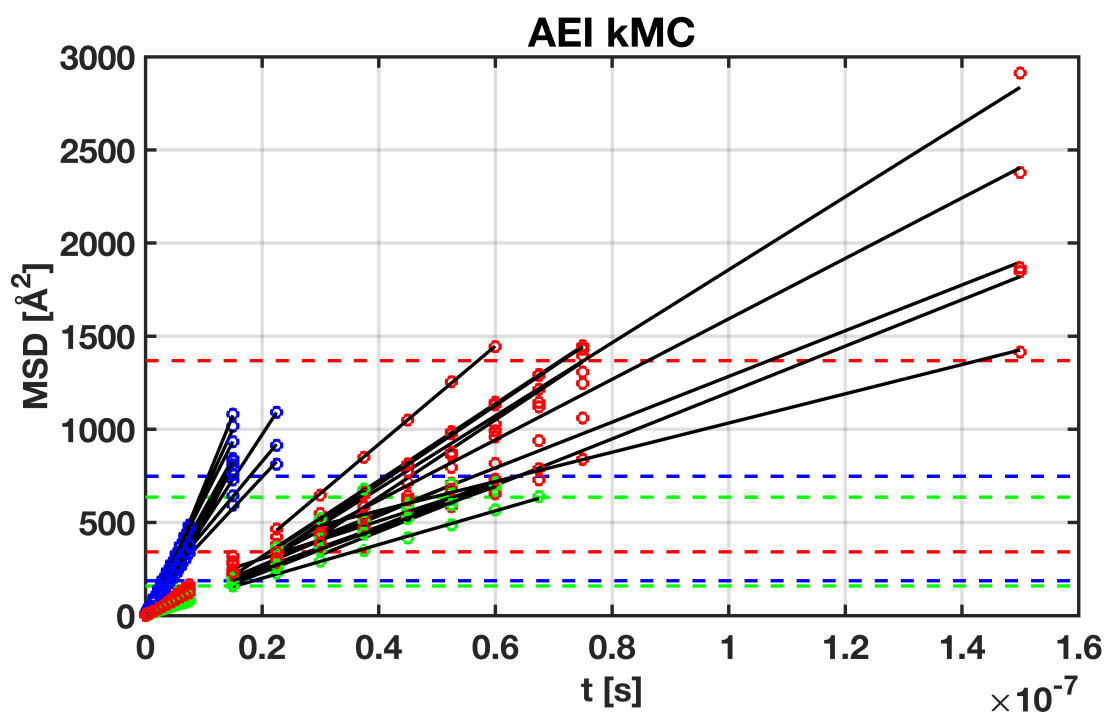

Figure S11: Linear plots of the kMC MSD (is  $x = \text{blue}$ ,  $y = \text{green}$ ,  $z = \text{red}$ ) as a function of time. The black lines represent the 1st degree polynomials fitted to each MSD curve. The horizontal dashed lines represent  $l^2$  and  $2l^2$  for diffusive directions in respective color.
