# Supplementary material
Source: PubMed Central journal article supplement (PMC6460401)

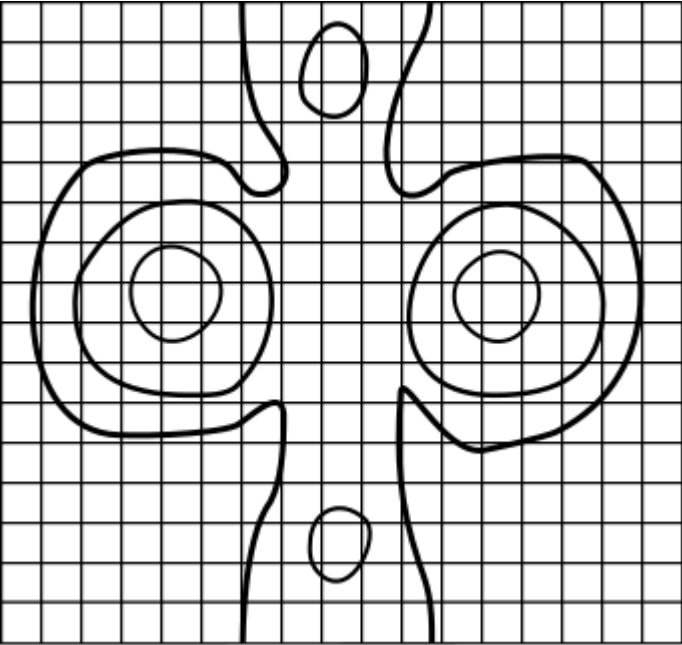

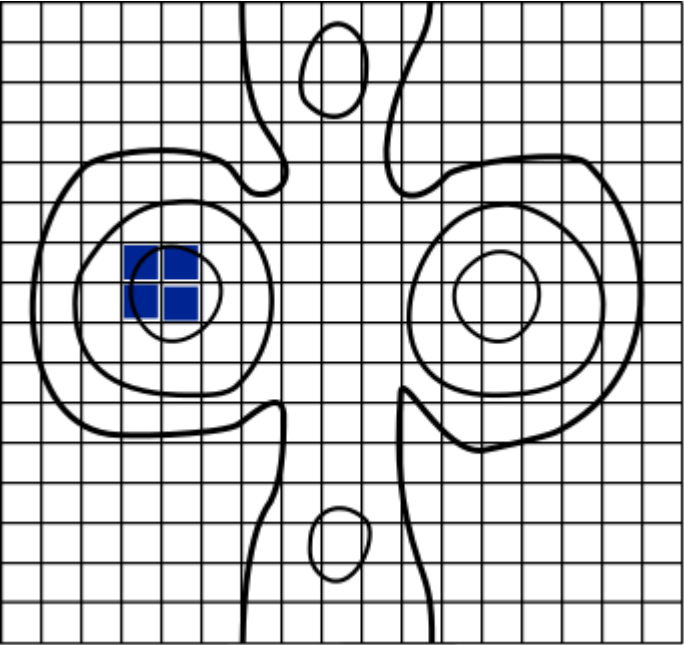

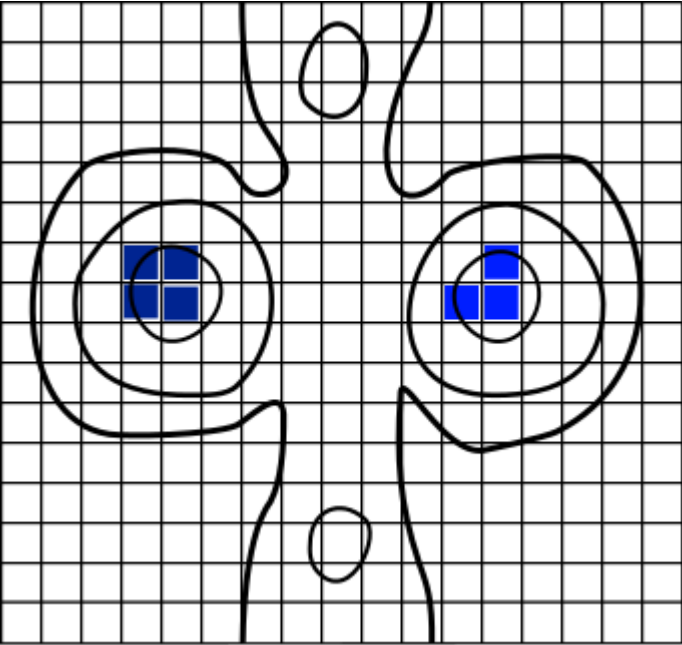

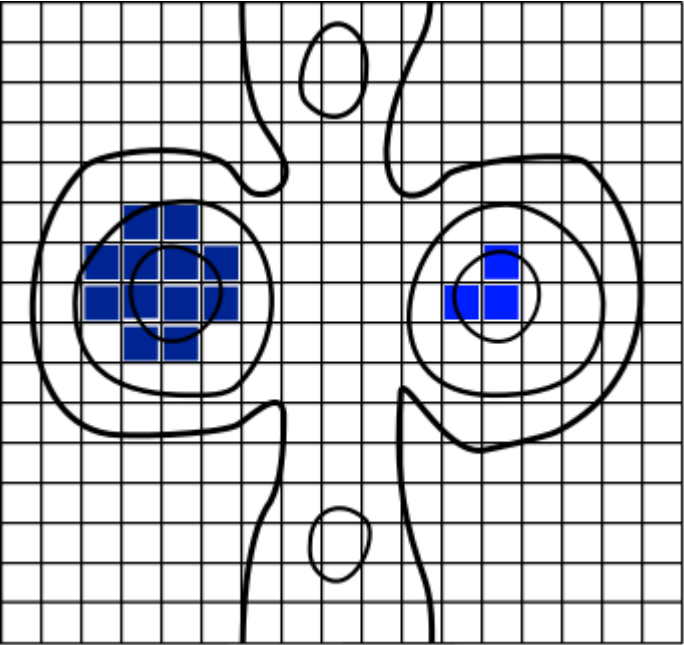

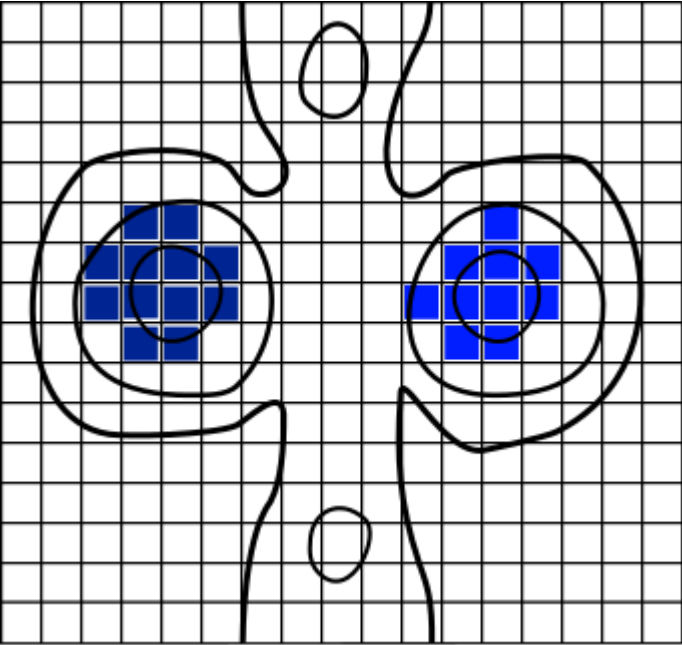

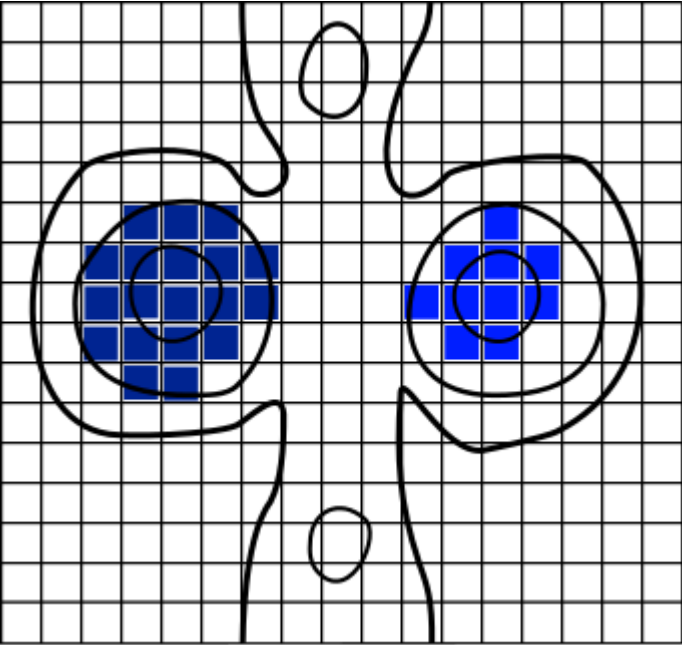

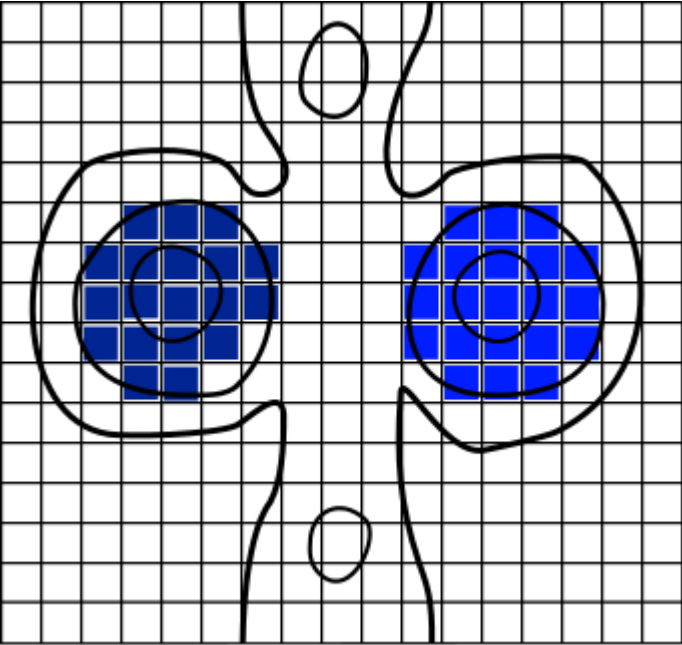

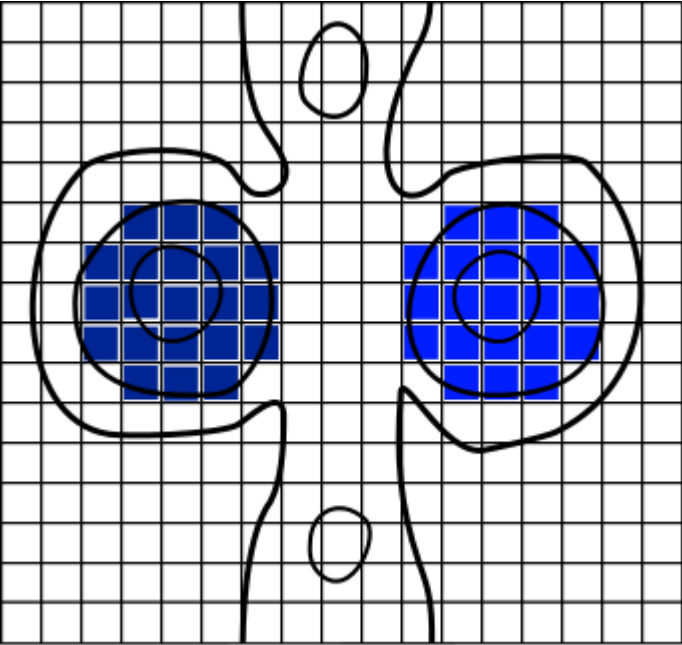



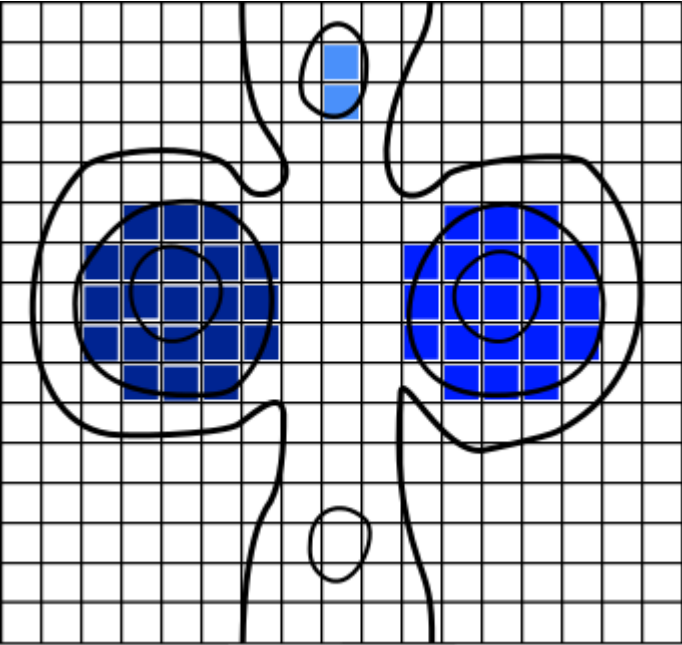

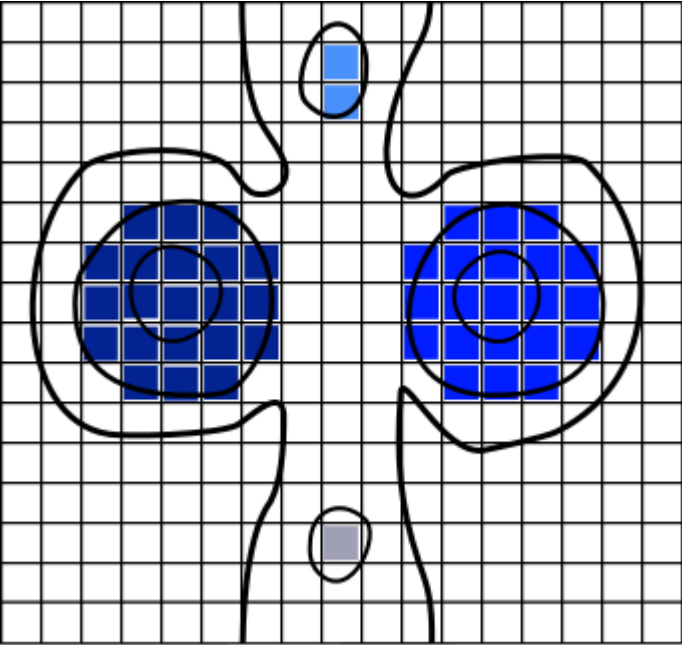

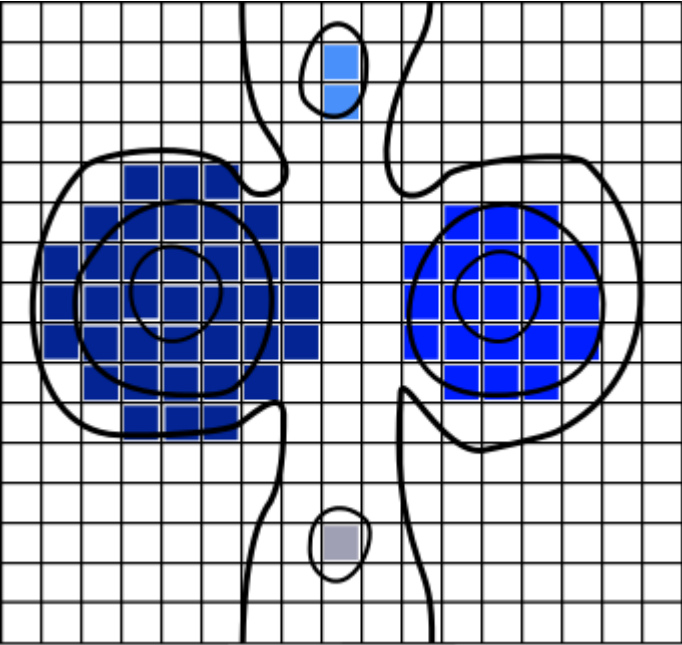

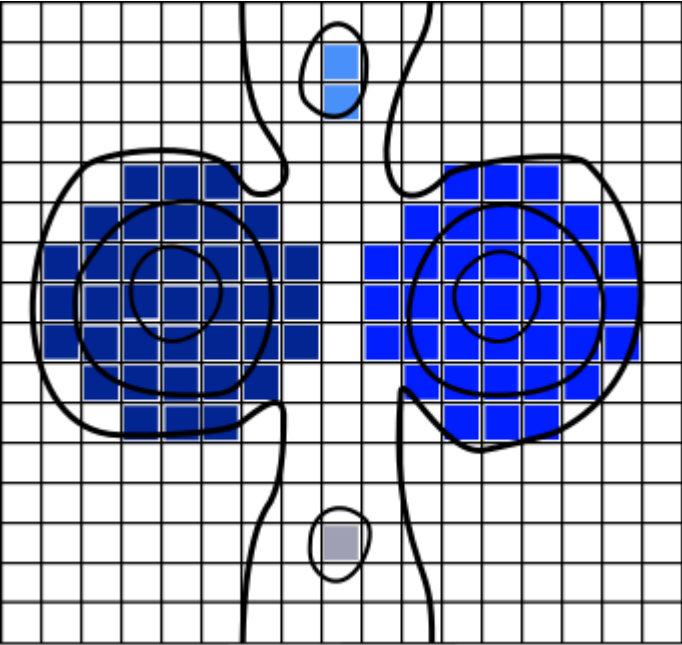

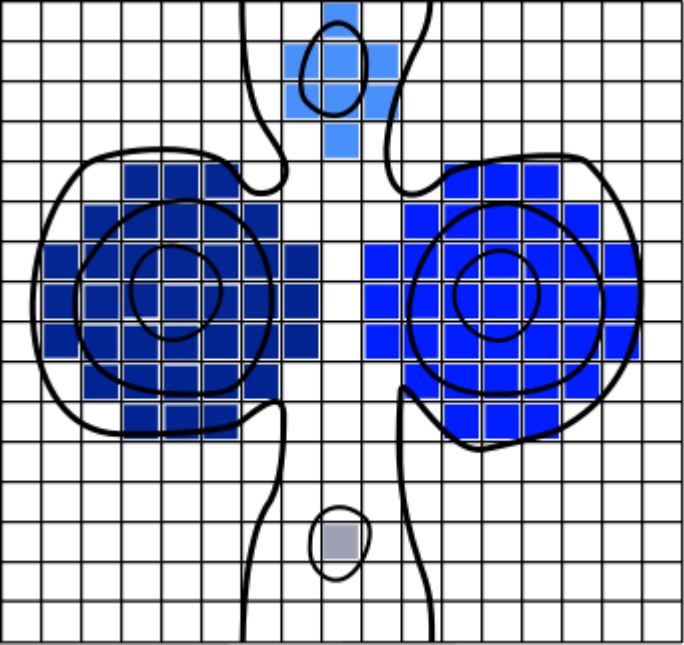

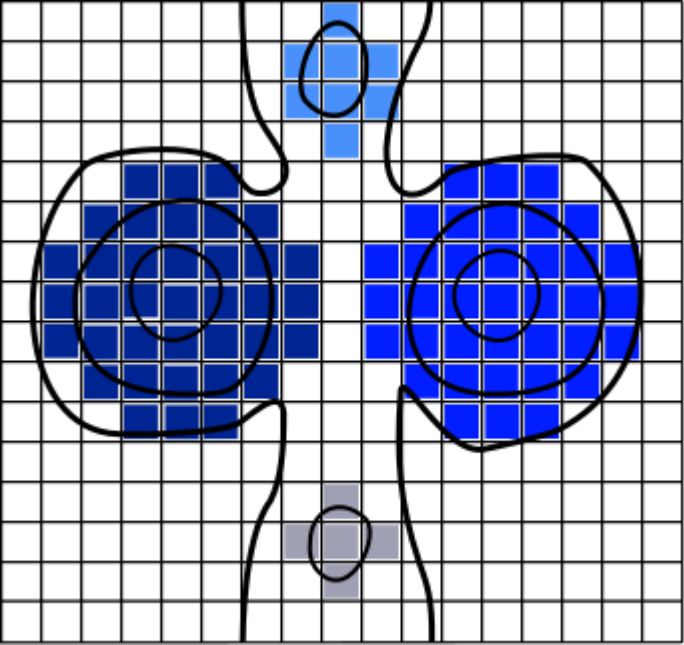

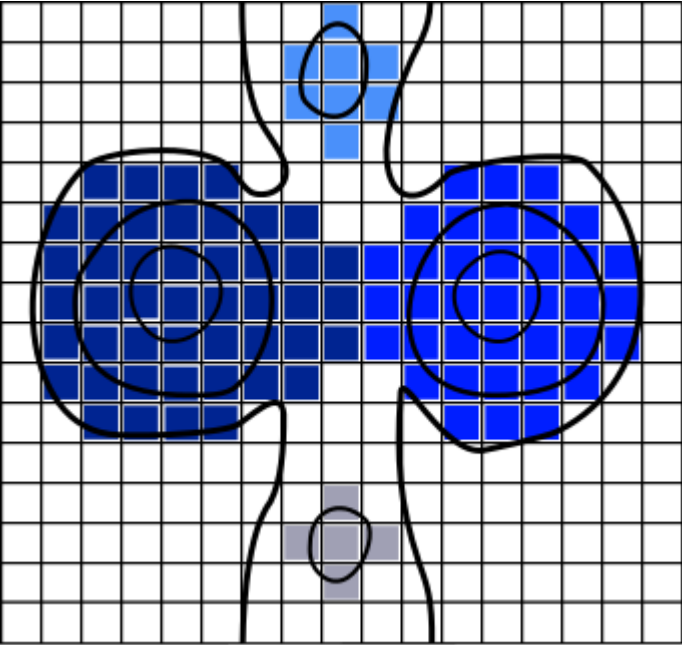

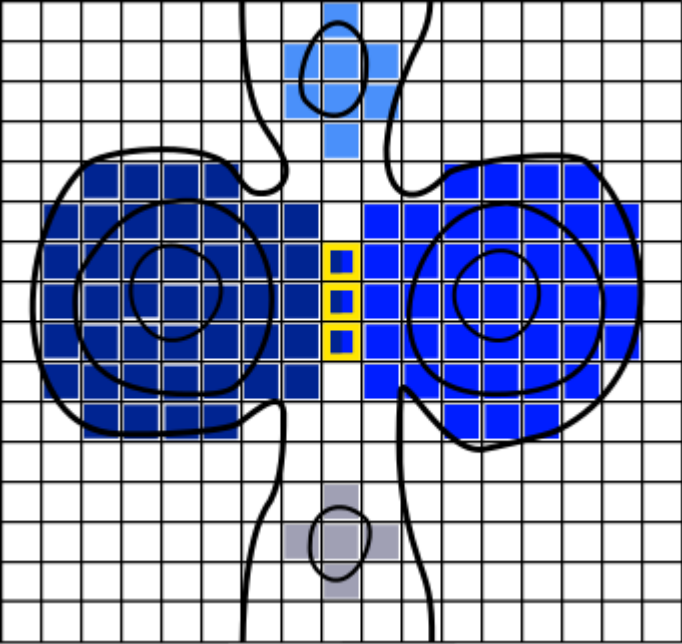



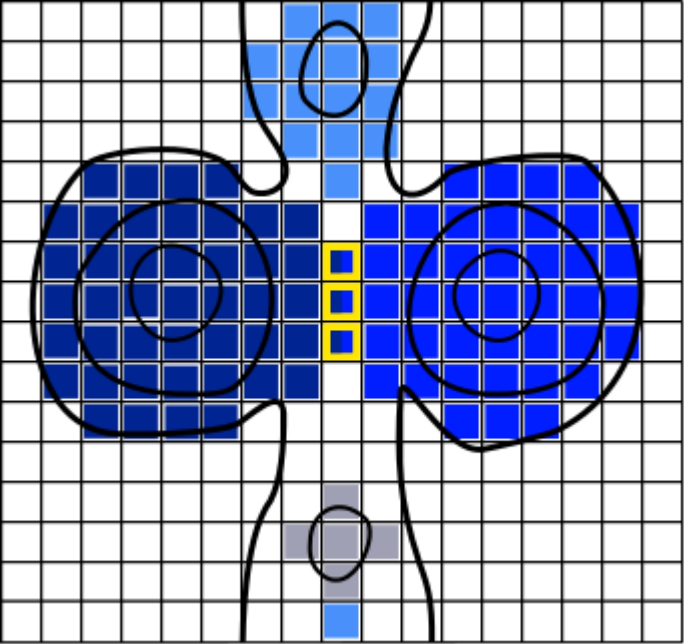

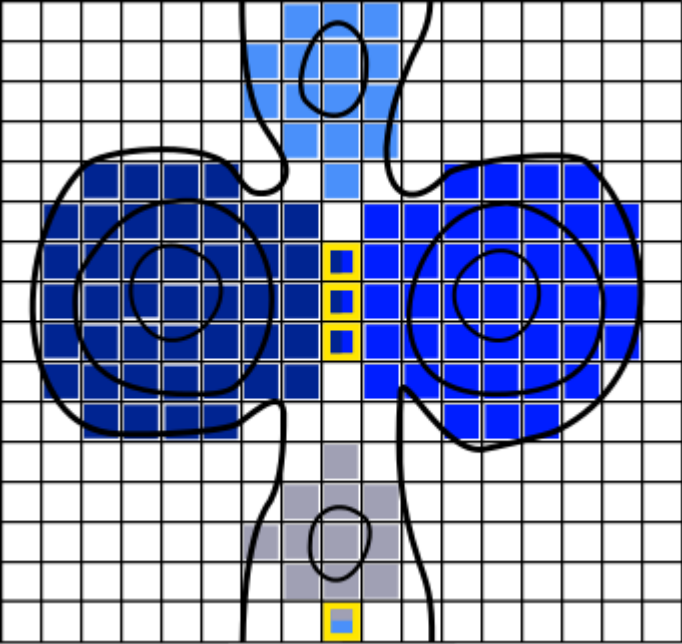

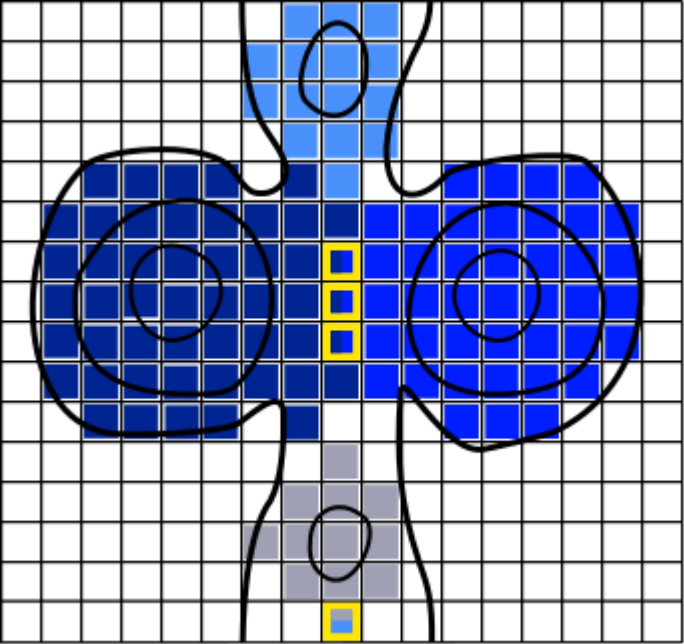

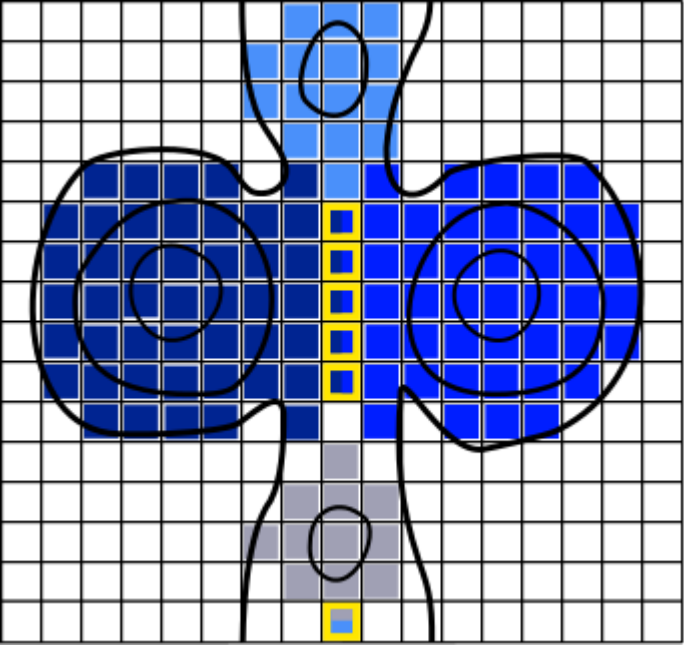

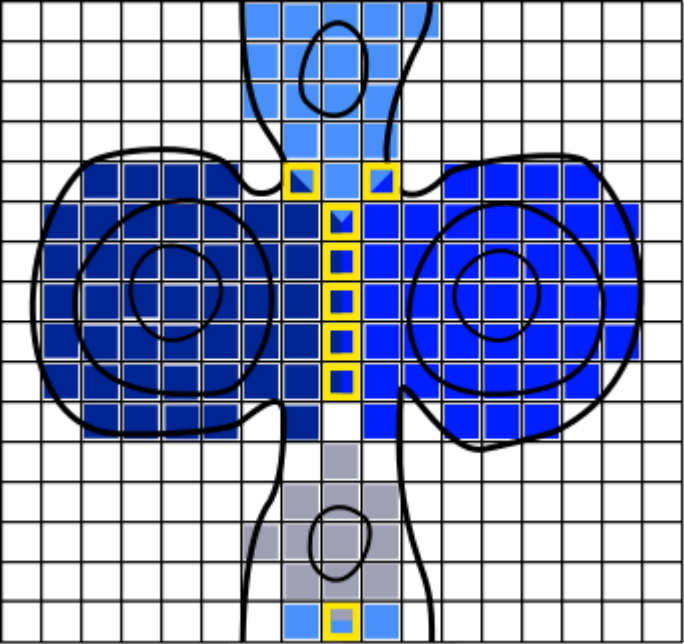

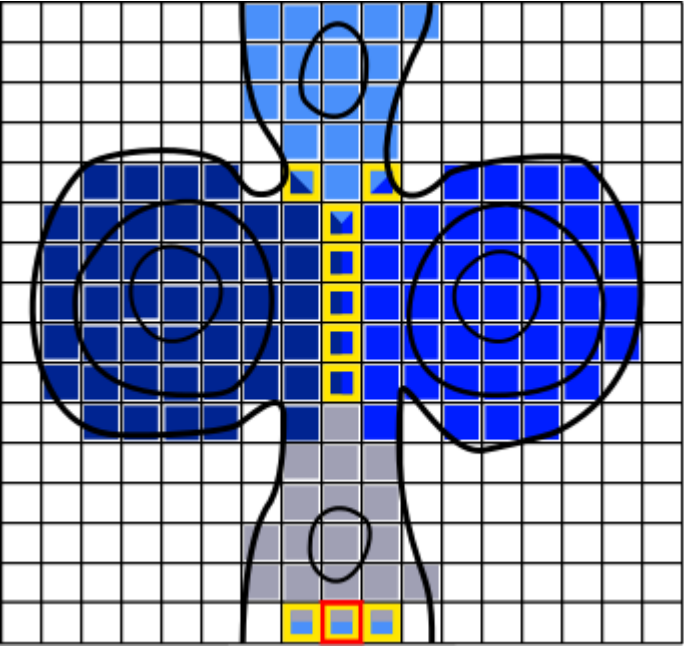

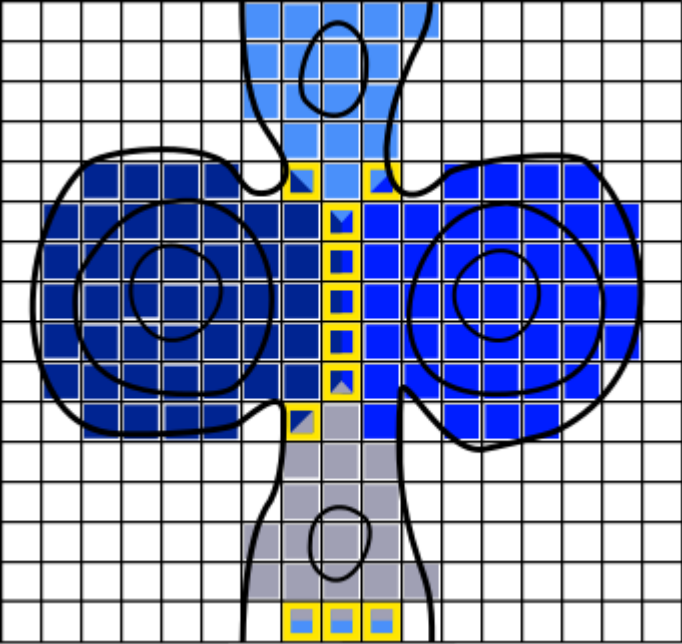

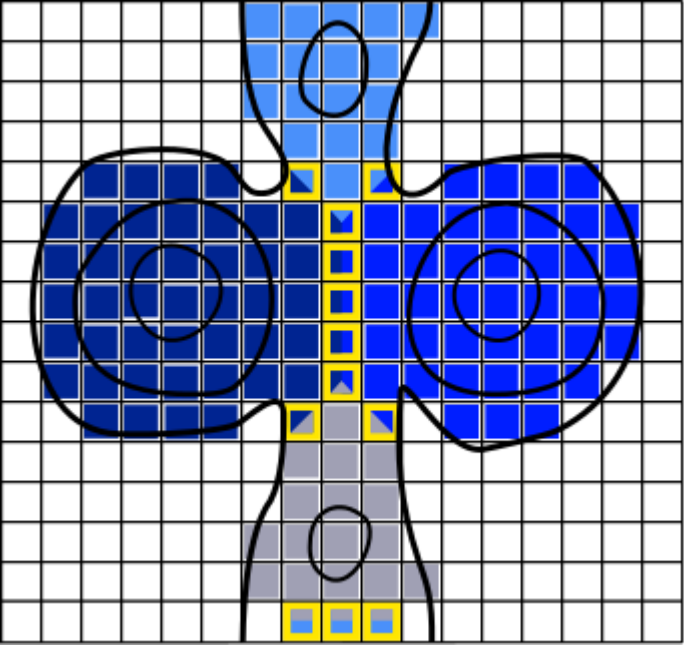



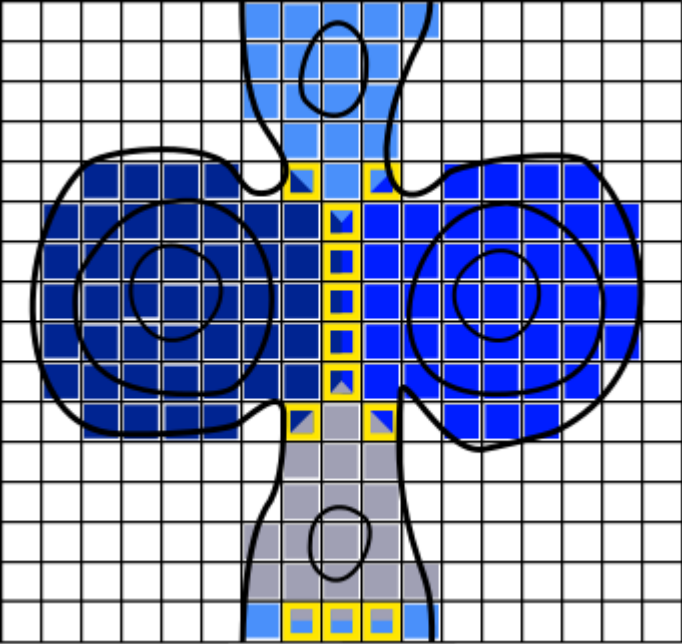

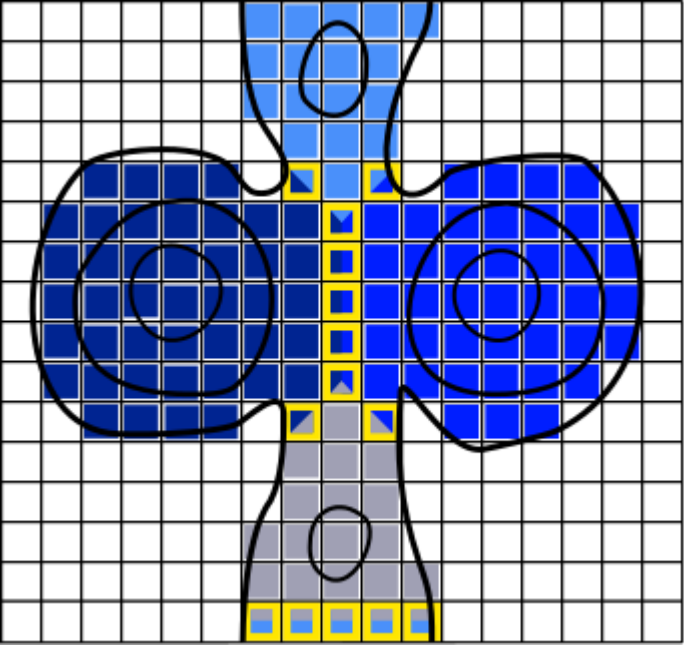

Supplement: ct8b01255_si_002.pdf [file ct8b01255_si_002.pdf]
